# Supplementary material for: Facile regeneration of oxidized porous carbon nitride rods by the de-aromatization of the heptazine network in bulk g-C3N4
Source: Royal Society of Chemistry journal article supplement (doi:10.1039/d1qi01607e), 2022-01-01
Supplement: d1qi01607e1.pdf [file d1qi01607e1.pdf]

## Supporting Information

### Facile regeneration of oxidized porous carbon nitride rods from the de-aromatization of the heptazine network in bulk g-C<sub>3</sub>N<sub>4</sub>

Qingqing Zhang,<sup>a</sup> Yuhe Chen,<sup>a</sup> Chengxiao Zhao,<sup>b</sup> Xiaofei Yang<sup>b\*</sup> and Zupeng Chen<sup>\*a</sup>

<sup>a</sup> Jiangsu Co-Innovation Center of Efficient Processing and Utilization of Forest Resources, International Innovation Center for Forest Chemicals and Materials, Jiangsu Province Key Laboratory of Green Biomass-based Fuels and Chemicals, College of Chemical Engineering, Nanjing Forestry University, Nanjing 210037, China.

<sup>b</sup> College of Science, Nanjing Forestry University, Nanjing 210037, China.

\*Corresponding authors: xiaofei.yang@njfu.edu.cn; czp@njfu.edu.cn.

#### Contents

|                                                                                                                                                             |    |
|-------------------------------------------------------------------------------------------------------------------------------------------------------------|----|
| <b>Fig. S1</b> SEM images of BCN and DMO-x. ....                                                                                                            | 1  |
| <b>Fig. S2</b> Normalized XRD patterns and FT-IR spectra of BCN and DMO-x. ....                                                                             | 2  |
| <b>Fig. S3</b> UV–visible absorption spectra of PCNR, BCN and DMO-6h. ....                                                                                  | 3  |
| <b>Fig. S4</b> Solid-state NMR spectra of DMO-6h. ....                                                                                                      | 4  |
| <b>Fig. S5</b> Comparison of the XRD patterns and FT-IR spectra of DMO-6h with melamine, cyanuric acid, and their supramolecular complex (CM complex). .... | 5  |
| <b>Fig. S6</b> SEM image and the corresponding linear elemental mappings of PCNR. ....                                                                      | 6  |
| <b>Fig. S7</b> The first-order kinetic plots of rhodamine B degradation in the presence of BCN and PCNR. ....                                               | 7  |
| <b>Fig. S8</b> Reusability of the PCNR in photocatalytic degradation of rhodamine B under the irradiation of 50 W white LED array. ....                     | 8  |
| <b>Table S1</b> Structural properties and photocatalytic performance of BCN and PCNR. ....                                                                  | 9  |
| <b>Table S2</b> Composition of BCN, PCNR, and DMO with different hydrothermal treatment times (determined by elemental analysis). ....                      | 10 |

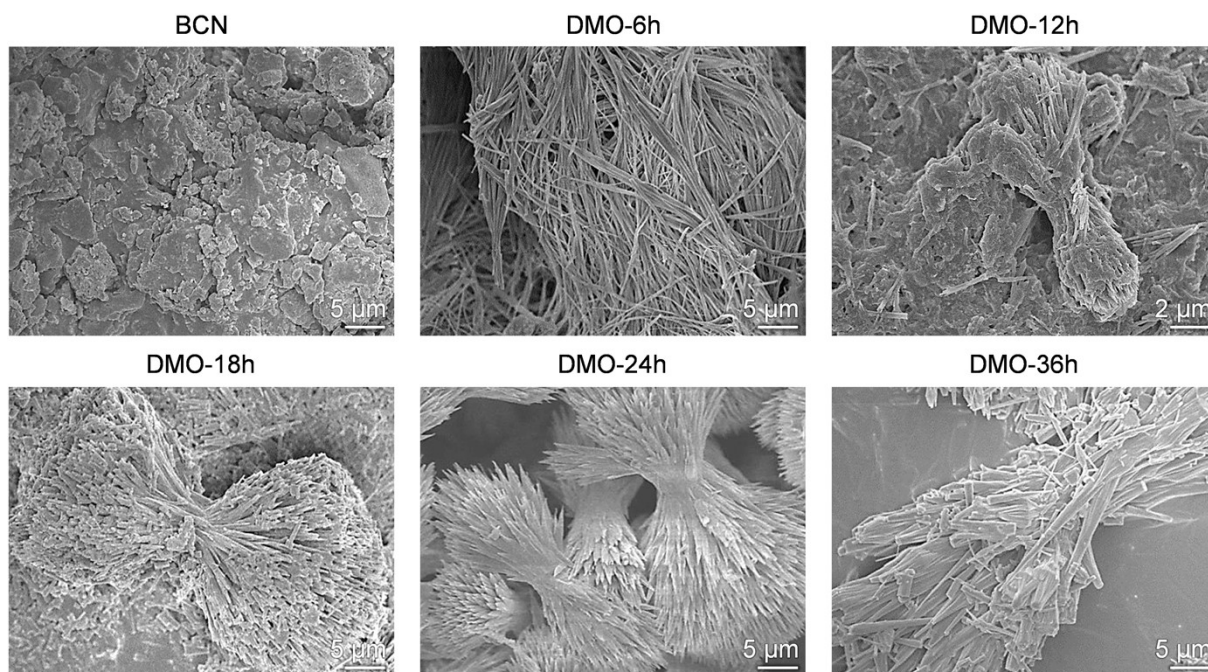

**Fig. S1** SEM images of the de-aromatized melem-containing oligomers (DMO) by hydrothermal treatment of BCN at 473 K for 6-36 h (DMO- $x$ ,  $x$  denotes the hydrothermal time). BCN was used as a reference.

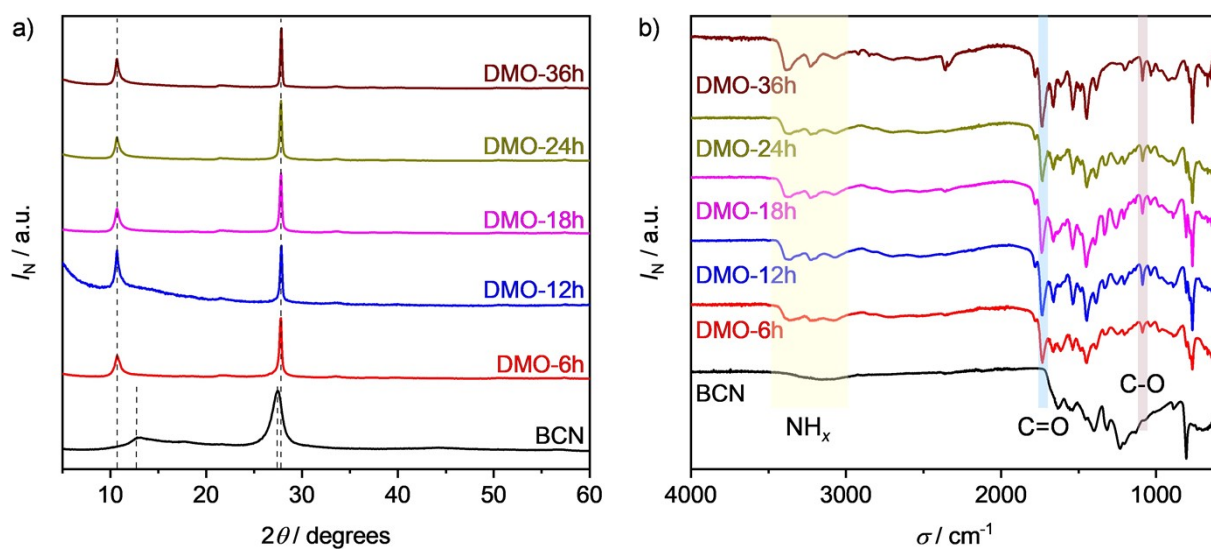

**Fig. S2** (a) Normalized XRD patterns and (b) FT-IR spectra of the de-aromatized melem-containing oligomers by hydrothermal treatment of BCN at 473 K for 6-36 h (DMO- $x$ ,  $x$  denotes the hydrothermal time). The stretching of the surface groups of  $-\text{NH}_x$  (3000-3500  $\text{cm}^{-1}$ ),  $-\text{C}=\text{O}$  (1734  $\text{cm}^{-1}$ ), and  $\text{C}-\text{OH}$  (1084  $\text{cm}^{-1}$ ) were highlighted. BCN was used as a reference.

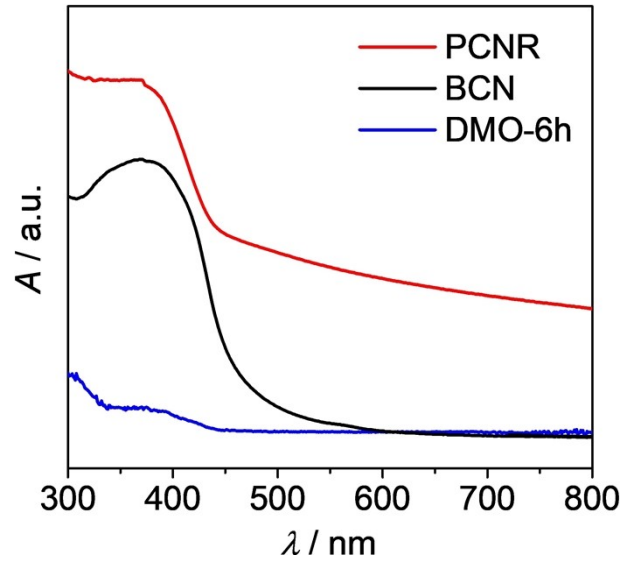

**Fig. S3** UV-visible absorption spectra of PCNR, BCN and DMO-6h.

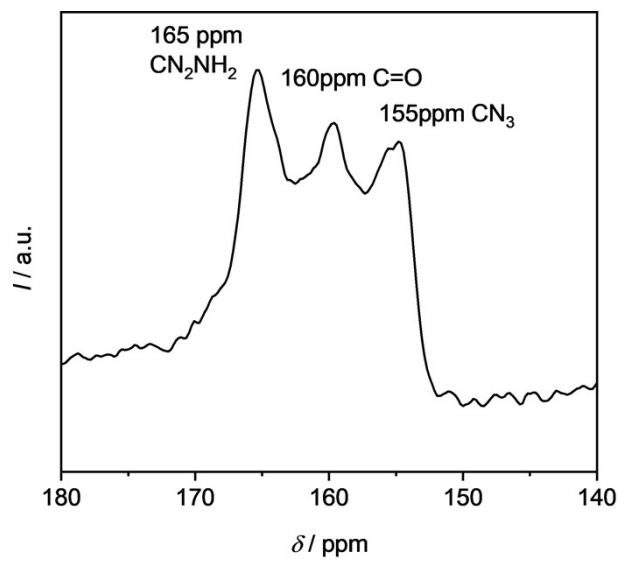

**Fig. S4** Solid-state  $^{13}\text{C}$  NMR spectrum of DMO-6h carried out at 100.6 MHz and 298 K.

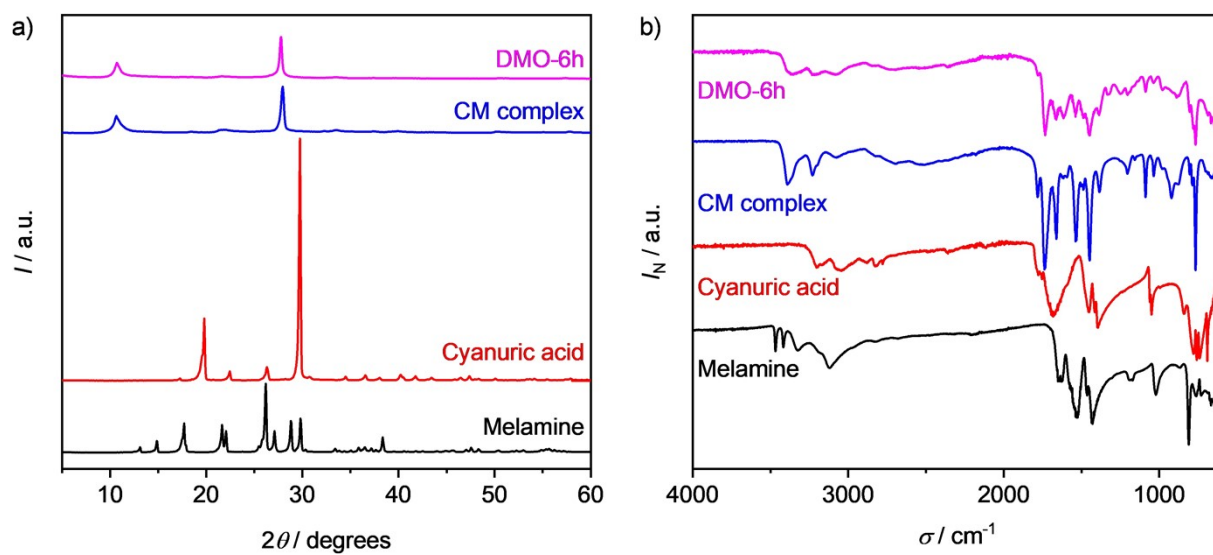

**Fig. S5** Comparison of the (a) XRD patterns and (b) FT-IR spectra of DMO-6h with melamine, cyanuric acid, and their supramolecular complex (CM complex), which were embedded in KBr pellet.

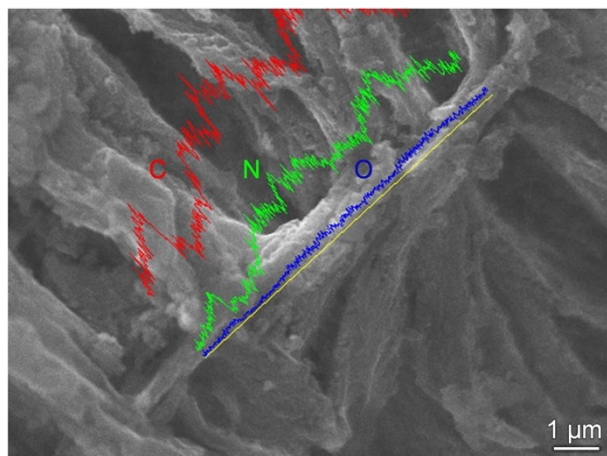

**Fig. S6** SEM image and the corresponding linear elemental mappings of PCNR.

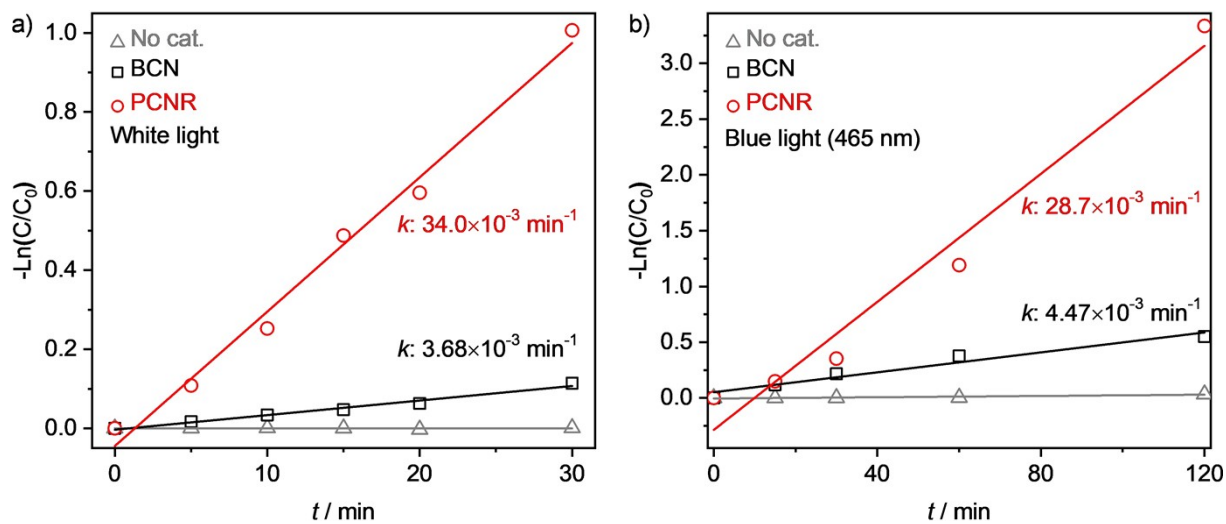

**Fig. S7** First-order kinetic plots of rhodamine B degradation in the presence of BCN and PCNR, under the irradiation of (a) white LED array and (b) blue light (465 nm) as the light source.



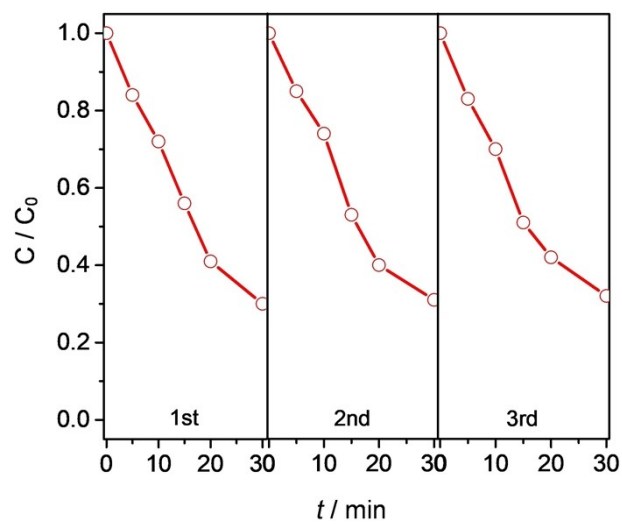

**Fig. S8** Reusability of the PCNR in photocatalytic degradation of rhodamine B under the irradiation of 50 W white LED array.

**Table S1** Structural properties and photocatalytic performance of BCN and PCNR.

| Sample | Band gap <sup>a)</sup><br>[eV] | $S_{\text{BET}}^{\text{b)}$<br>[m <sup>2</sup> g <sup>-1</sup> ] | $d_{\text{Pore}}^{\text{c)}$<br>[nm] | $V_{\text{Pore}}^{\text{d)}$<br>[cm <sup>3</sup> g <sup>-1</sup> ] | $k_{\text{White}}^{\text{e)}$<br>[ $\times 10^{-3}$ min <sup>-1</sup> ] | $k_{\text{Blue}}^{\text{f)}$<br>[ $\times 10^{-3}$ min <sup>-1</sup> ] |
|--------|--------------------------------|------------------------------------------------------------------|--------------------------------------|--------------------------------------------------------------------|-------------------------------------------------------------------------|------------------------------------------------------------------------|
| BCN    | 2.78                           | 9.5                                                              | 2.8                                  | 0.01                                                               | 3.68                                                                    | 4.47                                                                   |
| PCNR   | 2.74                           | 47.3                                                             | 3.2                                  | 0.12                                                               | 34.0                                                                    | 28.7                                                                   |

a) Determined by Tauc plots; b) BET method; c) Average pore diameter from the pore size distribution; d) Volume of N<sub>2</sub> adsorbed at  $p/p_0 = 0.98$ ; e,f) The reaction rate calculated of rhodamine B degradation *via* first-order kinetic model under the irradiation of 50 W (e) white LED array and (f) blue light (465 nm) as the light source.

**Table S2** Composition of BCN, PCNR, and DMO with different hydrothermal treatment times (determined by elemental analysis).

| Sample  | N [wt.%] | C [wt.%] | H [wt.%] | O [wt.%] | C/N <sup>a)</sup> | Formula                                                         |
|---------|----------|----------|----------|----------|-------------------|-----------------------------------------------------------------|
| BCN     | 60.37    | 34.70    | 2.04     | 2.88     | 0.57 (0.67)       | C <sub>6</sub> N <sub>9</sub> H <sub>4</sub> O <sub>0.4</sub>   |
| PCNR    | 53.58    | 32.74    | 2.32     | 11.36    | 0.61 (0.71)       | C <sub>6</sub> N <sub>8.4</sub> H <sub>5</sub> O <sub>1.6</sub> |
| DMO-6h  | 48.53    | 28.25    | 3.63     | 19.59    | 0.58 (0.68)       | C <sub>6</sub> N <sub>9</sub> H <sub>9</sub> O <sub>3</sub>     |
| DMO-12h | 49.30    | 28.93    | 3.53     | 18.24    | 0.59 (0.68)       | C <sub>6</sub> N <sub>9</sub> H <sub>9</sub> O <sub>3</sub>     |
| DMO-18h | 50.77    | 29.60    | 3.48     | 16.14    | 0.58 (0.68)       | C <sub>6</sub> N <sub>9</sub> H <sub>9</sub> O <sub>2.5</sub>   |
| DMO-24h | 51.08    | 29.27    | 3.34     | 16.31    | 0.57 (0.67)       | C <sub>6</sub> N <sub>9</sub> H <sub>8</sub> O <sub>2.5</sub>   |

a) Weight ratio (in parentheses, the corresponding molar ratio).
